# Supplementary material
Source: PubMed Central journal article supplement (PMC3416503)

# Supplementary Table and Figures for Johnson & Edlind, “Mutational Analysis of *Saccharomyces cerevisiae* Fks1”

TABLE S1. Primers used in this study.<sup>a</sup>

|                  |                                                                                |
|------------------|--------------------------------------------------------------------------------|
| pJK90F           | 5'-TGGCATGTGAGATTCTCCGA-3'                                                     |
| pJK90R           | 5'-CGTCATATGGATAGGAGCCT-3'                                                     |
| ScFks1-1TAGF     | 5'- <u>GTGGTTTGTACGCATGCAAGCTTGATATCGAAATGAACTGATCAACAACCTT</u> -3'            |
| ScFks1-1204TAGR  | 5'- <u>GTGGTTTGTACGCATGCAAGCTTGATATCGAAATGACCACTAGAGGTGGTGT</u> -3'            |
| ScFks1-300TAGR   | 5'- <u>TGGTCTAGAGGTGTAACCACTTGAGTTCTTAGGTTCCAGGGGAGACA</u> ACTGG-3'            |
| ScFks1-445TAGR   | 5'- <u>TGGTCTAGAGGTGTAACCACTTGAGTTCTTAGGCCAAGTACGGGTCTCTTTATA</u> -3'          |
| ScFks1-475TAGR   | 5'- <u>TGGTCTAGAGGTGTAACCACTTGAGTTCTTAGGGTAAAAATGTTGGTGAATTATATGC</u> -3'      |
| ScFks1-531TAGR   | 5'- <u>TGGTCTAGAGGTGTAACCACTTGAGTTCTTAGGTCTACGAGATAGATGTTGAG</u> -3'           |
| ScFks1-561TAGR   | 5'- <u>TGGTCTAGAGGTGTAACCACTTGAGTTCTTAGGTGCAGCAGTGGAGTAGAC</u> -3'             |
| ScFks1-610TAGR   | 5'- <u>TGGTCTAGAGGTGTAACCACTTGAGTTCTTAGGAAATGCAGCAGTGAATGTTTGA</u> -3'         |
| ScFks1-637TAGR   | 5'- <u>TGGTCTAGAGGTGTAACCACTTGAGTTCTTAGGGTACGATTCTGAATATTTGGCA</u> -3'         |
| ScFks1-650TAGR   | 5'- <u>TGGTCTAGAGGTGTAACCACTTGAGTTCTTAGGAAATCTAATTGGATCTCTCAAAG</u> -3'        |
| ScFks1-669TAGR   | 5'- <u>TGGTCTAGAGGTGTAACCACTTGAGTTCTTAGGACAAAGTACCGCACCCAC</u> -3'             |
| ScFks1-675TAGR   | 5'- <u>TGGTCTAGAGGTGTAACCACTTGAGTTCTTAGGAAATCTTGGGTGCATTTACAA</u> -3'          |
| ScFks1-680TAGR   | 5'- <u>TGGTCTAGAGGTGTAACCACTTGAGTTCTTAGGAAACCAAACCTAAGACAATCTTG</u> -3'        |
| ScFks1-685TAGR   | 5'- <u>TGGTCTAGAGGTGTAACCACTTGAGTTCTTAGGGAAGTCGGTAGCGATAACCA</u> -3'           |
| ScFks1-715TAGR   | 5'- <u>TGGTCTAGAGGTGTAACCACTTGAGTTCTTAGGGATAGAAATACCTAAATAGAAA</u> AGA-3'      |
| ScFks1-726TAGR   | 5'- <u>TGGTCTAGAGGTGTAACCACTTGAGTTCTTAGGCAATCTTGTGAAGATATTTCT</u> -3'          |
| ScFks1-742TAGR   | 5'- <u>TGGTCTAGAGGTGTAACCACTTGAGTTCTTAGGAAATTTCCATATCAGTAGTAGCC</u> -3'        |
| ScFks1-1008TAGR  | 5'- <u>TGGTCTAGAGGTGTAACCACTTGAGTTCTTAGGAGCCAATCTCTGCATAGAGAC</u> -3'          |
| ScFks1-1294TAGR  | 5'- <u>TGGTCTAGAGGTGTAACCACTTGAGTTCTTAGGGCATAATAGAATGTTAGGAA</u> -3'           |
| ScFks1-1354TAGR  | 5'- <u>TGGTCTAGAGGTGTAACCACTTGAGTTCTTAGGCCAATCAACCGCAGGTTGG</u> -3'            |
| ScFks1-1380TAGR  | 5'- <u>TGGTCTAGAGGTGTAACCACTTGAGTTCTTAGGTTCAATTAGTTCTTGAACAACA</u> -3'         |
| ScFks1-1410TAGR  | 5'- <u>TGGTCTAGAGGTGTAACCACTTGAGTTCTTAGGAGAGTAGATTTGGCCCGCAA</u> -3'           |
| ScFks1-1425TAGR  | 5'- <u>TGGTCTAGAGGTGTAACCACTTGAGTTCTTAGGTATATAACGAGCACCACCAAT</u> -3'          |
| ScFks1-1470TAGR  | 5'- <u>TGGTCTAGAGGTGTAACCACTTGAGTTCTTAGGAGCTTGCCAATGTGCGACAG</u> -3'           |
| ScFks1-1493TAGR  | 5'- <u>TGGTCTAGAGGTGTAACCACTTGAGTTCTTAGGCTGATGTGGATTGAAAACGAAA</u> -3'         |
| ScFks1-1550TAGR  | 5'- <u>TGGTCTAGAGGTGTAACCACTTGAGTTCTTAGGACCAGCTTTCAGATTC</u> -3'               |
| ScFks1-1590TAGR  | 5'- <u>TGGTCTAGAGGTGTAACCACTTGAGTTCTTAGGAGTCTTGACACCGGTTGAG</u> -3'            |
| ScFks1-1630TAGR  | 5'- <u>TGGTCTAGAGGTGTAACCACTTGAGTTCTTAGGTAAGGGACCAGAGCAGCATG</u> -3'           |
| ScFks1-1666TAGR  | 5'- <u>TGGTCTAGAGGTGTAACCACTTGAGTTCTTAGGGCTCTCCAAAACCCACATGA</u> -3'           |
| ScFks1-1707TAGR  | 5'- <u>TGGTCTAGAGGTGTAACCACTTGAGTTCTTAGGGGCTGTATTGGCATGATCGT</u> -3'           |
| ScFks1-1738TAGR  | 5'- <u>TGGTCTAGAGGTGTAACCACTTGAGTTCTTAGGTGAAAGCTCAATTACCTTGGC</u> -3'          |
| ScFks1-1775TAGR  | 5'- <u>TGGTCTAGAGGTGTAACCACTTGAGTTCTTAGGCAGTTGACAGATTAATACAT</u> -3'           |
| ScFks1-1821TAGR  | 5'- <u>TGGTCTAGAGGTGTAACCACTTGAGTTCTTAGGGGTACAGCAGGACCAATAA</u> -3'            |
| ScFks1-1876TAGR  | 5'- <u>TGGTCTAGAGGTGTAACCACTTGAGTTCTTAGGTTTTATAGTTGACCAGGTCTTA</u> -3'         |
| ScFks1-1830*TAGR | 5'- <u>TGGTCTAGAGGTGTAACCACTTGAGTTCTTAGGCTATCCAATGTGTTTGTGGATCTTA</u> -3'      |
| ScFks1-1840*TAGR | 5'- <u>TGGTCTAGAGGTGTAACCACTTGAGTTCTTAGGCTATAGATTGTGAACAACGCCATC</u> -3'       |
| ScFks1-1850*TAGR | 5'- <u>TGGTCTAGAGGTGTAACCACTTGAGTTCTTAGGCTAGTCATTATTGGTTGATTTATTGG</u> -3'     |
| ScFks1-1860*TAGR | 5'- <u>TGGTCTAGAGGTGTAACCACTTGAGTTCTTAGGCTAACTTTGATAAGTTGACATTTGGG</u> -3'     |
| ScFks1-1870*TAGR | 5'- <u>TGGTCTAGAGGTGTAACCACTTGAGTTCTTAGGCTACTTTAATGATGGCGTATGAGTA</u> -3'      |
| ScFks1-1876*TAGR | 5'- <u>TGGTCTAGAGGTGTAACCACTTGAGTTCTTAGGTTATTTTATAGTTGACCAGGTCTTA</u> -3'      |
| ScFks1-301F      | 5'-AGAGTTCGTCATATCGCCTTA-3'                                                    |
| ScFks1-R319AR    | 5'-CCAAGTAGTCAAGAGCACACTTGTAGATAAAAACATAAACATTACAGCAGTGAATGCGACTTGATTAGCTTC-3' |
| ScFks1-D1102AF   | 5'-TACATTC AATTAATTGCTGCCAACCAAGATAACTACTTGGAAGAATGTCTGAAGATTAGA-3'            |
| ScFks1-D1102AR   | 5'-GTTATCTTGGTTGGCAGCAATTAATTGAATGTATTACCTCTGTAAAAAATCAAAGCATG-3'              |
| ScFks1-D1197AF   | 5'-CATTATGGTCATCCGGCTTTCATTAATGCTACGTTTATGACCACTAGAGGTGGTGGTTCC-3'             |
| ScFks1-D1197AR   | 5'-CGTAGCATT AATGAAAGCCGGATGACCATAATGCAATTTACCACCAATTTGAGATAAAAGT-3'           |

<sup>a</sup> Underline indicates homology with pJK90 plasmid

\* Primer incorporates STOP codon following indicated Fks1 residue

FIG. S1. ClustalW2 alignment of Fks1 sequences from fungi representing all four fungal phyla. TMHMM-predicted TMH are shown in red; PRO-TMHMM-predicted TMH are underlined. Hotspots 1, 2, and 3 are indicated.

```

S. cerevisiae -----MNTDQQPYQG----- 10
C. albicans -----MSYNDNNHHYYDPN----Q 15
A. fumigatus -----MSGYQQGGGHYNDGYGHQEH 20
C. neoformans -----MSYPNPPPPPKG----- 12
R. oryzae -----MADTNSKETTVDHHEDEDFIDCAPNFPS 29
A. macrogyrus MQQPAGLNDGFTRYPGSHAGHKPQQACHRTVDRSRLSSNRLSKQLSVQQLQLQLPPDGLS 60

S. cerevisiae QTDYTQGPNGQSSEQDY-----DQYGQPLYPSQADG--YYDPNVAAG----- 51
C. albicans QGGMPHPHQGGEGYYQQQY-----DDMGQ--QPHQQD--YYDPN----- 49
A. fumigatus GDSFYQDEHGQAYYDHDYGDGYDRSGYYGPDNSHNQOEGGYDAG----- 66
C. neoformans SASFSSSSDPFNQTNQLP-----YDSNAQFPQHAFAHPSAP----- 50
R. oryzae NDNVENEDVKPKGLEEIRAYYTNTVEGSSHDTNPAPHGQIYEDDLKLPSPITLSM----- 84
A. macrogyrus HDHAALGERNSVKVLNVAGGMLGAGAAPSAQWTSHPNPAIRQHDALRASTKRP IHGDDLT 120

S. cerevisiae -----TEADMYGQPPNESYDQDYTNGEYYGQPPNMAAQ--DGENFSDFSSYGP-PGTPG 103
C. albicans -----AQYQQQPYDMDGYQDQAN--YGGQPMNAQGYNADPEAFSDFSYGGQTPGTPG 99
A. fumigatus -----QPHDDYYGDHYYDQNGGQQGYDNRGRRRGDSEEDSETFSDF TMRSETARAAD 118
C. neoformans -----NPGAGGAGVAPPGQGGYAPYYDNEPEMGGR--WEGGGMGRETWASESGWSQN 101
R. oryzae ---NVPLHSTYENAIKDDQQAQKQNASPFSAKKVGPNPKYKQTQGNLYAFSANSSTTYHPN 141
A. macrogyrus TSRGTALVSSASIVASDFDDDEDDDDDEYDQKARVQQHGPATWSPNNRPTHQRLNQGNLG 180

S. cerevisiae YDSYG-----GQ 110
C. albicans YDQYG-----TQ 106
A. fumigatus MDYYGRGDERYSYAD-----SQ 136
C. neoformans EPNYP----- 106
R. oryzae QDTFDVDILASLADGGD-----RYAK 163
A. macrogyrus FDDFDNVSVMSGRSIISSRVANSARGSYTGPFGMSSLRRLTEGSVFGAANTASPAVIST 240

S. cerevisiae Y-----TASQMSYG-EPNSSGTSTPIYG----NYDPNAIAMALPNEPYPAWTADSQ 156
C. albicans Y-----TPSQMSYGGDPRSSGASTPIYGGQGGYDPTQFNMS--NLPYPAWSADPQ 156
A. fumigatus YGGRGYGYRPPSSQISYG-ANRSSGASTPVYG---MDYGNALPAGQRSREYPYPAWASDQ 192
C. neoformans -----PSDYHGGPGYLPSTRASPTFE-----GSNAGHRPRDPYPAWTVDAN 147
R. oryzae YASSADSMALLANTKYKGSQMLGHNESQSSVGSAPMTSSIQGYATQEYYPYPSWGPEN 223
A. macrogyrus LVDTKVGPEELLDEF SVVDEQREPKGHTRFVSMQEQLLHPESQDSRTSLPLPSRFAPSDP 300

S. cerevisiae SPVSIQIEDIFIDL TNRLGFQRDSMRNMFDFHFMVLLDSR SRMSPDQALLSLHADYIGG 216
C. albicans APIKIEHIEDIFIDL TNKFGFQRDSMRNMFDFM TL LDSR SRMSPAQALLSLHADYIGG 216
A. fumigatus VPVSKIEIEDIFLDLVNKFQFQRDSMRNMYDHLMTLDSR SRMTPNQALLSLHADYIGG 252
C. neoformans IPLSKIEIEDVLIDLANKFGFQKDSRNVYDFLMIQLDSR SRMSPNQALLTLHADYIGG 207
R. oryzae VPI SFRELQKIFDNLAKKFGFQKDSVKNMSQHLMAMLDSR SRLIPQVALDSLHADYIGG 283
A. macrogyrus RPVTRELIEDMFIDLQRRFGFQADSVRNQLEYMLTLIDSRVARMSLDLAIASLHADIIGG 360
*:. . :. . : * :. : * * * * * * * :. : : * * * * * * * : * : * * * * * * *

S. cerevisiae DTANYKKWYFAAQDLMDDEIG-FRNMSLGKLSRKARKAKKKNKAMEEANPE--DTEETL 273
C. albicans DNANYRKWYFSSQDLDDSLG-FANMTLGKIGRKARKASKKSKKARKAAEEHGQDVALA 275
A. fumigatus DNANYRWSYFAAHLDDDAVG-FANMKLGKADRKRTRKARKAAKAAQQNPEN---VEETL 308
C. neoformans EHANYRKWYFAAQDLDDAIGAVQNPGLNRVRSVARRGGK-TKNPLATAQEK----- 258
R. oryzae DNANYKKWYFASQMDIYDQTE-----EEKNVAKDIGDEHEL----- 319
A. macrogyrus ENANYRQWYVSTFGPHELGPD-----PSADLMGTLTKK----- 393
: * * * : * * * :

S. cerevisiae NKIEGDSLEAADRFRWKAKMNQLSPLERVRHIALYLLCWGEANQVRF TAECLCFIYKCAL 333
C. albicans NELEGDYSLEAAEIRWKAKMNSLTPEERVRDLALYLLIWGEANQVRF TPECLCYIYKSAT 335
A. fumigatus EALEGDNSLEAAEYRWKTRMNKMSQHDRVRQLALFLLCWGEANQVRF TPECLCFIFKCAD 368
C. neoformans -----SLESATSRWRTAMNMSQYDRLRQVALYLLCWGEAAQVRFMP ECLCFIFKCAD 311
R. oryzae -----LLRHEEKWLLMRNLSNSEKQLDLALYLLWGEAAPIRY TPEALCFIYKMAS 371
A. macrogyrus -----VVRSRWRKVMKRLTQADRAMQTALWFCIWGEAANIRFMPECLCF LFKLAC 443
: * * * : * * * : : * * * : * * * : * * * : * * * : * * * : * * *

S. cerevisiae DYLDSPLCQQRQEPMEGDFLNRVITPIYHFIRNQVYEIV-DGRFVKRERDHNKIVGYDD 392
C. albicans DYLN SPLCQQRQEPVPEGDYLN RVITPLYRFRS QVYEIV-DGRFVKRERDHNKIVGYDD 394
A. fumigatus DYYNSPECQNRVPEVEFTYLN EII TPLYQYCRDQGYEIV-DGKYVRRERDHNQIIGYDD 427
C. neoformans DYYRSP ECQNRQEAVPEGLYLRAVIKPLYRFLRDQGYEVV-DGKFLRRERDHDKIVGYDD 370
R. oryzae DYYRHHSSTEKPD-VPEGTYLDTI IKPLYQFRDQTYVLK-ENKYVRRERDHDKIVGYDD 429
A. macrogyrus DHLTLDKAAPSIAVLGDGAF LDKVITPLYRAYREQGYNLSE DGKLVQRDRHSDIVGYDD 503
* : . : : * * * * * * * : : : * * * * * * *

```



*S. cerevisiae* -----ETAAYE-GNENAEKEDALKSQIDDLPF 923  
*C. albicans* -----ETAAYENGDDSEKLSKIDDLPF 926  
*A. fumigatus* -----ETSQFN--GEPEKSEKDVAKSKIDDLPF 959  
*C. neoformans* -----ESDAFN-GGNPFASDEKKEAKKADDIPF 894  
*R. oryzae* -----SSTLNEPHTHSDPDNRTKKLPKNDLDPF 966  
*A. macrogyrus* STASSPSMRPHGGLPRASWCPQQEKAHVHDNGTGEQNDLLAEDDDEDEARETAEKMF 1082

: . :: \*

*S. cerevisiae* YCIGFKSAAPEYTLRTRIWASLRSQTLYRTISGFMNYSRAIKLLYRVENPEIVQMFGGNA 983  
*C. albicans* YCIGFKSAAPEYTLRTRIWASLRSQTLYRTVSGFMNYARAIKLLYRVENPELVQYFGGDP 986  
*A. fumigatus* YCIGFKSAAPEYTLRTRIWSSLRSQTLYRTVSGFMNYSRAIKLLYRVENPEVVQMFGGNS 1019  
*C. neoformans* YTIQFKSAAPEYTLRTRIWASLRAQTLYRTVSGFMNYSKAIKLLYRVENPEVVQLFGGNT 954  
*R. oryzae* YCIGFKTSKPEYTLRTRIWASLRAQTLYRTVSGFMNYKKAIKLLYRVENPDNIRVYQDDK 1026  
*A. macrogyrus* RAVGYTNPSPFVLRTRIWTSLRSQTLYRTVSGFMNYSKAIQIRHRAENLHYLFQGVCS 1142

:\*... \*...\*\*\*\*\*:\*\*\*:\*\*\*\*\*:\*\*\*\*\* :\*\*\*: :\*.\*\* . :

*S. cerevisiae* EGLERELEKMARKKFKFLVSMQRLAKFKPHELENAEFLLRAYPDLQIAYLDEEPPLTEGE 1043  
*C. albicans* EGLELALERMARRKFRFLVSMQRLSKFKDDEMENAELLRAYPDLQIAYLDEEPPALNEDE 1046  
*A. fumigatus* EKLERELERMARRKFKIVVSMQRYAKFNKEERENTEFLLRAYPDLQIAYLDEEPPVNEGE 1079  
*C. neoformans* ESRIFSERLARMARKKFKFVSMQRYAKFNKEEHEHENAELLRAYPDLQIAYLDEEPPRKDGG 1014  
*R. oryzae* DRLENELDVLTRSKFKFIVAMQRYAKFNKAENEDAELFKAFPDLQVAYIDEEPSAEEGG 1086  
*A. macrogyrus* EEIEDEADYVSRKFRLLVAMQRYQHFEDKNDESVELLFSVFADLAVSYIEEVPSAVEGE 1202

: :\* : : \* : : \* : \* \* : \* . : \* . \* : \* : . : \* \* : \* : \* . :

*S. cerevisiae* EPRIYSALIDGHCIEILDNGRRRPFKFRVQLSGNPILGDGKSDNQNHAIIFYRGEYIQLIDA 1103  
*C. albicans* EPRVYSALIDGHCIEILDNGRRRPFKFRVQLSGNPILGDGKSDNQNHAVIFHRGEYIQLIDA 1106  
*A. fumigatus* EPRLYSALIDGHCIEILDNGMRKPKFRVQLSGNPILGDGKSDNQNHAIIFYRGEYIQVIDA 1139  
*C. neoformans* ESRIFSERLARMARKKFKFVSMQRYAKFNKEEHEHENAELLRAYPDLQIAYLDEEPPRKDGG 1074  
*R. oryzae* EVTYYSALIDGHAPIMENGRKPKFRVRLPGNPILGDGKSDNQNHAIIFYRGEFLQLVDA 1146  
*A. macrogyrus* PPTYYSCLIDGWCNMTASGARQFRFRIRLPGNPILGDGKSDNQNSAIVFTRGEVLQLIDA 1262

:\*.\*\*\*\* . : . \* \* : \* \* :\*.\*\*\*\*\*.\*\*\*\*\* :\*: \* \* \* :\*:\*\*

*S. cerevisiae* NQDNYLEECLKIRSVLAEEFELNVEQVNPYAPGLRYEEQTTN-HPVAIVGAREYIFSENS 1162  
*C. albicans* NQDNYLEECLKIRSVLAEEFEMNVEHVNPYAPNLKSEDNNTKKDPVAFVLAEGAREYIFSENS 1166  
*A. fumigatus* NQDNYLEECLKIRSVLAEEFELTTDNVSPYTPGIP----STNTNPVAIVGAREYIFSENSI 1195  
*C. neoformans* NQDNYLEECLKIRSVLGEFEFEKSVSTQSPYAAQGH---ADFAKFPVAILGAREYIFSENSI 1131  
*R. oryzae* NQDNYLEECLKIRSVLGEFEVLEPIQESPYSPSYQ---KSNSSPVAIVGAREYIFSENSI 1202  
*A. macrogyrus* NQDSYLEESLKVANVLEFELPGDSVHSPYSRYN----RGRAPVAIVGTREHIFSERV 1317

\*\*\*.\*\*\*\*.\*: .\*.\*\*\* .\*\*:. \*\*\*:\*.\*\*\*:\*\*\*\*.

*S. cerevisiae* GVLGDVAAGKEQTFGTLFARTLSQIGGKLYHGHDPDFINATFMTTRGGVSKAQKGLHLNED 1222  
*C. albicans* GVLGDVAAGKEQTFGTLFARTLAQIGGKLYHGHDPDFLNATFMTTRGGVSKAQKGLHLNED 1226  
*A. fumigatus* GVLGDVAAGKEQTFGTLFARTLAQIGGKLYHGHDPDFLNGIFMTTRGGVSKAQKGLHLNED 1255  
*C. neoformans* GILGDIAGKEQTFGTLAARLSYIGGKLYHGHDPDFLNAIYMNTTRGGVSKAQKGLHLNED 1191  
*R. oryzae* GILGDVAAGKEQTFGTLQIRIMAKSGGKLYHGHDPDFLNAIYMNTTRGGVSKAQKGLHLNED 1262  
*A. macrogyrus* GSLADVAAGKEFAFGTLIQRAMTRLGSRQLQYGHDPDLNLSLYMITRGGVSKAQKGLHLNED 1377

\*.\*:\*\*\*\* :\*\*\*\* \* : : \*.:\*\*\*\*\*:\*. :\* \*\*\*\*:\*\*\*\*\*

*S. cerevisiae* IYAGMNAMLRGGRIKHCHEYQCCKGRDLGFGTILNFTTKIGAGMGEQMLSREYYLGTQL 1282  
*C. albicans* IYAGMNAMRRGKIKHCHEYQCCKGRDLGFGSILNFTTKIGAGMGEQMLSREYFYLTQL 1286  
*A. fumigatus* IYAGMNAMIRGGRIKHCHEYQCCKGRDLGFGSILNFTTKIGTGMGEQMLSREYYLGTQL 1315  
*C. neoformans* IFAGMLAFGRGRIKHCHEYQCCKGRDLGFGTILNFTTKIGTGMGEQMLSREYYLGTQL 1251  
*R. oryzae* IYAGMNSFIRGGRIKHCHEYQCCKGRDLGFGSILNFTTKIGTGMGEQMLSREYYLGTQL 1322  
*A. macrogyrus* IYAGMNVLSRGGRIKHCSEYLQCGKGRDLGFTSVLNF TAKLGSAGEQVLSRDVWYLGTRL 1437

\*.\*\*\* : \*\*\*:\*\*\* \*\* \*\*\*\*\* :\*\*\* :\*:.\* \*\*\*:\*\*\*: :\*:\*\*:

*S. cerevisiae* PVDRFLTFYYAHPGFHLNLF~~IQLSLQMFMLTLVNLSL~~LHESIMCIYDRNPKTDVLP 1342  
*C. albicans* PLDRFLSFYYGHPGFH~~INNLFIQLSLQVFLVLANL~~NSLAHEAIMCSYNKDVVTDVLYP 1346  
*A. fumigatus* PLDRFLSFYYAHPGFH~~INNMFLMSVQMFMLVNLGAL~~KHETITCRYNPDLPTDPLRP 1375  
*C. neoformans* PIDRFLTFYYGHPGFH~~INNILVMSVQVFMALVFLG~~TLNKQLTVCRYSSGGDILPGQS- 1310  
*R. oryzae* PLDRFLTFYYAHPGFH~~LNNIFIMLSVQMFMLAALFI~~SAMGASLTICEYNADAPEDVALTP 1382  
*A. macrogyrus* PLDRLLSYFAHIGFYINA~~AFVVASVVLFLWT~~SAMAAMQAR-----HPGKCTGKDAAS 1491

\*.\*\*\*:\*.\*\*\* :\*\*\*: \* : : \* : : . : .

**hotspot 2**

*S. cerevisiae* IGCYNFQPAVDWVRRY~~TLISIFIVFWIAFVPIVVQELI~~ERGLWKATQRFCHLLSLSPMFE 1402  
*C. albicans* FGCYNIAPAVDWIRRY~~TLISIFIVFFISFIPLVVQELI~~ERGVWKAQRFVRHIFISMSPF 1406  
*A. fumigatus* TYCANLTPIVD~~WNRCIISIFIVFFISFVPLAVQEL~~TERGVWRMAMRLAKHFGSVSFMFE 1435  
*C. neoformans* -GCYNLVPVFKWIKR~~CIISIFIVFWMAFVPLFVQEL~~TERGTGRAILRLCKHFLSLSPVFE 1369  
*R. oryzae* EGCYNLVPIDFVWKR~~CILSIVAVFLVAFVLPFLQEL~~TEKGFWRSLTRIGKHFASLSPLFE 1442  
*A. macrogyrus* TCPTDLATLQ~~WVSLCVSELIFSLILPLLLQ~~MVNEYGVGRALKRILMQFFSLVSLFE 1551

: : . .\* : . : : : \* : \* : \* : \* : \* : \* : \* : \* . \*\*

*S. cerevisiae* VFAGQIYSSALLSDLAIGGARYISTGRGFATSRIIPFSILYSRFAGSAIYMGARSMLMLLF 1462  
*C. albicans* VFVAQIYSSSVFTDLTVGGARYISTGRGFATSRIIPFSILYSRFADSSIYMGARLMLILLF 1466  
*A. fumigatus* VFVQCQIYANAVHQNLSEFGGARYIGTGRGFATARIIPFGLVYSRFAGPSIYAGARSLMLLF 1495  
*C. neoformans* VFSTQIYMHSILNDLTFGGARYIATGRGFATRISFSILYSRFAGPSIYLGMRITLVLLLF 1429  
*R. oryzae* IFVTTQIYTNVLENLVYGGARYIGTGRGFATSRIISFATLYSRFTGPSIYVGGARNFLIMLF 1502  
*A. macrogynus* GFAIYVYSMFVHNLAALGGAGYIATGRAVSTARAPFSTLYQRFSRQGISLGVALLGMLL 1611  
: \* . : \* \*\* \* . \*\* . : \* . \* . \* . \* . : \* \* : : \* :

*S. cerevisiae* GTVAHWQAPLLWFWASLSLIFAPFVFNPHQFAWEDFFLDYRDYIRWLSRGNNOYHRN-- 1520  
*C. albicans* GTVSHWQAPLLWFWASLSALMFSPFIFNPHQFAWEDFFLDYRDFIRWLSRGNTKWHRN-- 1524  
*A. fumigatus* ATSTVWTAALIWFWVSLALCISPFLFNPHQFAWNDFIDYRDYLRWLSRGNRSRSHAS-- 1553  
*C. neoformans* IITLVVWPHLIYFWITVVGLCVAPFLFNPHQFAIADF IIDYREFLRWMSRGNRSTHAN-- 1487  
*R. oryzae* ASLAYWIPHLIYFWFTVVALIVSPFVFNPNQFAPVDFLVYDREFIRWMSRGNRSPHAN-- 1560  
*A. macrogynus* VSTQGFQAAALVFWIFVISYALSPFLFNPNQFVLADFLLDYRVTLRWLFAGHQAPAPRNL 1671  
: : . \* : : \* : . . : \* : \* : \* : \* : \* : \* : \* : \* :

*S. cerevisiae* SWIGYVRMSRARITGFKRKLVDGESEKAAGDASRAHRTNLI MAEII PCAIYAAGCFIAFT 1580  
*C. albicans* SWIGYVRLSRSRITGFKRKLTDVSEKAAGDASRAHRSNVLFADFLPTLIYTAGLYVAYT 1584  
*A. fumigatus* SWIGFCRLSRTRITGYKRKLLGVPSEKSGDVPRARLTNIFSEIIAPLVAVTLVPYL 1613  
*C. neoformans* SWVGYCLSRTRVTGFKRRLGLPSEKSSDVPRAPWKA ILIGEII GPICLAALFVICYL 1547  
*R. oryzae* SWISHTRSARARITGYKRS-KSTEATSGIADMPRASMAAMI SEIIFPLIYAILCTIPYA 1619  
*A. macrogynus* SWANLVVADRGRILT-----GERGGATRARLRV FVRNLLADLVVIAFAVGLYG 1719  
\*\* . \* \* : \* . . \* \* : : : : :

*S. cerevisiae* FINAQTGVK-----TTDDDRVNSVLRI ICTLAPIAVNLGVLF FCMGMSCCSGPLFG 1632  
*C. albicans* FINAQTGVTSYPYEINGSTDPQVNSTLRLLIICALAPVVIDMGCLGVCLAMACCAGPMLG 1644  
*A. fumigatus* YINSRTGVR-----DNPEPTDAILRLAIVAAGPIAINAGVAGVFFGMACCMGPIFS 1664  
*C. neoformans* FIKSFAVDG-----QIQPLVRIAI IALGPVWNMALLITLFLISVFLGPCLN 1595  
*R. oryzae* FTKGFDATDP-----TLPSTGSPGLLRIGVIALAPVLMNVAGLAMFFAMSVGICVLS 1672  
*A. macrogynus* YAHPKFSILD-----SIIIRVAAWPAMLGVCFAMSAVSLALSFLGQIP- 1763  
: : . : \* : . . : . : : : \*

*S. cerevisiae* MCCKKTGS-VMAGIAHGVAIVIVHIAFFIVMWVLESFNFVRMLIGVVTCIQCQRLIFHCMT 1691  
*C. albicans* LCCKKTGA-VIAGVAHGVAIVIVHIIFFIVMWVTEGFNFARLMGIATMIYVQRLLFKFLT 1703  
*A. fumigatus* MCCKKFGA-VLAAIAHAIAIVIVLLAIFEVMMFFLESWSWPRMLIGMIAAAAIQRFIYKLI 1723  
*C. neoformans* SYTHQFGA-TMAALAHFGAVAGMLVFFELLWFLELWNTSHAVLGI IAVISVQRICIFKFLI 1654  
*R. oryzae* SVGKQVWARSWAALAHGWSVMNLI IIFEVFFVLEEWNL TNVVLGVVAISSIQRFVVKLLT 1732  
*A. macrogynus* ----FVARLVPAIGLPTLALIAIAWVAWALEGFALPGTLVALFPFAAVLHAIEITLAL 1818  
: . . . : . . : : : \* : : : : :

*S. cerevisiae* ALMLTREFKNDHANTAFWTGKYGKMGYMAWTQPSRELTAKVIELSEFAADFVLGHVIL 1751  
*C. albicans* LCFLTREFKNDKANTAFWTGKWYNTGMGMAFTQPSREFVAKI IEMSEFAGDFVLAHII 1763  
*A. fumigatus* ALAL TREFKHDQNSIAWWTGKWYN--MGWHSMSQPGREFLCKITELGYFSAD FVLGHVLL 1781  
*C. neoformans* AVFLSREFKHDETNRAWWTGVWFRNLGSHALSQPAREFVVKTIEMGLYSADFIACHLLL 1714  
*R. oryzae* VLCLTREFKHDGANRWWTGKWYG-----RGQFLNQPVSL 1767  
*A. macrogynus* FVVPPEFDTKTAHRAFWTGRWHT--LGAFAPVYVRELLVVPFELAWFALDWA TIHVLV 1876  
. . . : . : \* \* . : : : :

*S. cerevisiae* ICQLPLIIIPKIDKFHSMFLWLKPSRQIR-----PPIYSLKQTRLRKRVMVK 1799  
*C. albicans* FCQLPFLFIPLVDRWHSMMFLWLKPSRLIR-----PPIYSLKQARLRKRVMVK 1811  
*A. fumigatus* FAMPLPALCVPFIDKFHSMFLWLRPSRQIR-----PPIYSLKQSKLRKRVR 1829  
*C. neoformans* ALLTIPMFIYPFDRVHATMLFWLAPNQIR-----PPIYSFRQRSQRKIVFK 1762  
*R. oryzae* FVKLSK----- 1773  
*A. macrogynus* AALFPVCLVPFVSDVHTLMLLWVRKPKKSDNGAPANGSGGAVADATAKPKHRRRRLRIAG 1936

*S. cerevisiae* YCSLYFLVLAIFAGCIIGPAVSAKIHKIHIGDSLGDG---VVHNLFPQINTTNDTG--- 1852  
*C. albicans* YCVLYFAVLILFIVIVAPAVASGQIAVDQFANIGSGS IADGLFQPRNVSNNDTGNHRP 1871  
*A. fumigatus* FAILYFGMLILFLVLLIAPLVVRSMLVKTPN-----LPFNLLQPLDKDNDTMV--- 1879  
*C. neoformans* YGLLYLI IQGIF IALIVVPI IIFKDVAG-----LTPKSVPFNGII--- 1801  
*R. oryzae* -----  
*A. macrogynus* AALMLAGTLLVLAALVVVPAIVPGPLAKIVAG-----IAGHLLPHALKAIPAAP--- 1985

*S. cerevisiae* -SQMSTYQSHYYHTPSLKTWSTIK- 1876  
*C. albicans* KTYTWSYLSTRFTGSTPYSTNPFV 1897  
*A. fumigatus* -TYTGNNIPAGFEPVESASSVATATS 1904  
*C. neoformans* -----  
*R. oryzae* -----  
*A. macrogynus* -----

FIG. S2. TMH predictions for fungal Fks1 sequences generated using TMHMM.

*Saccharomyces cerevisiae* Fks1:

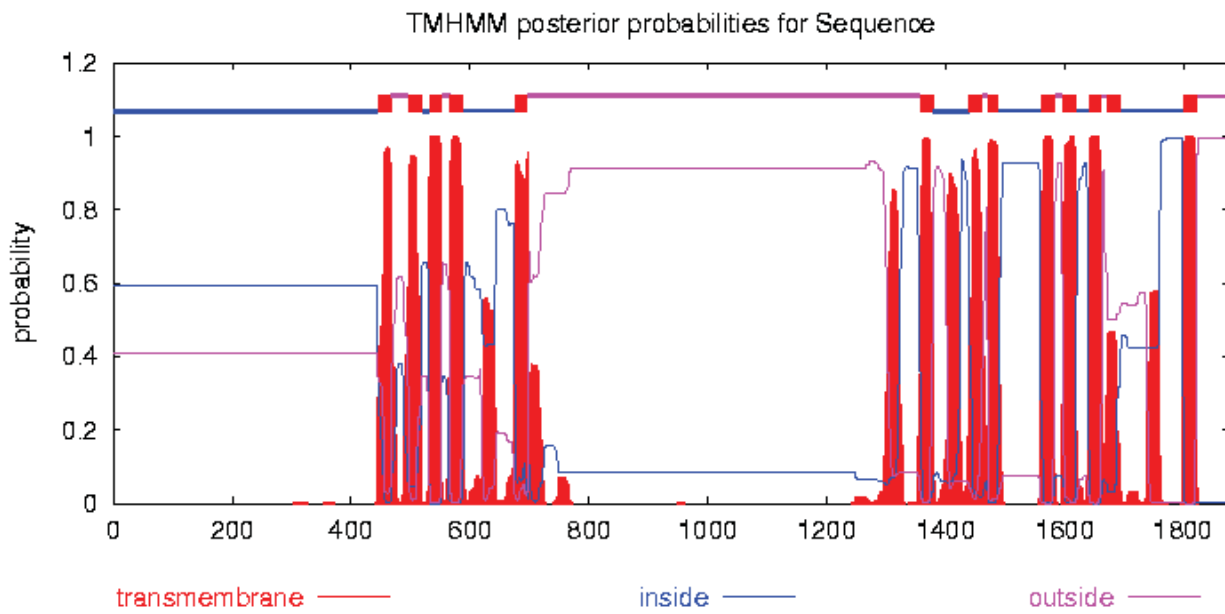

*Candida albicans* Fks1/Gsc1:

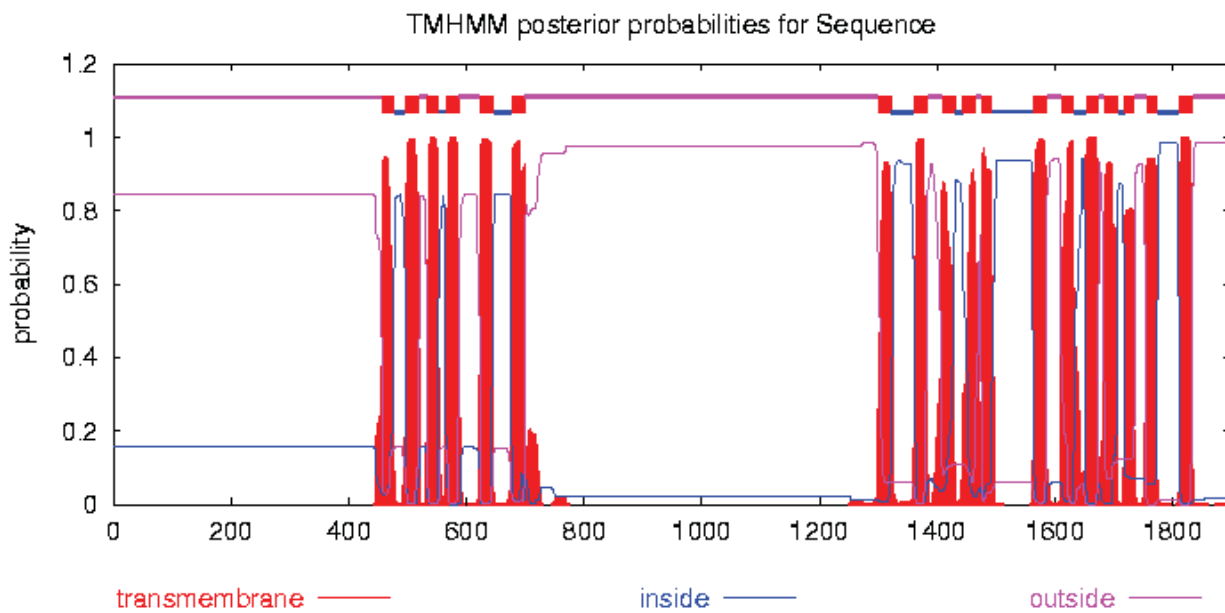

*Aspergillus fumigatus* Fks1:

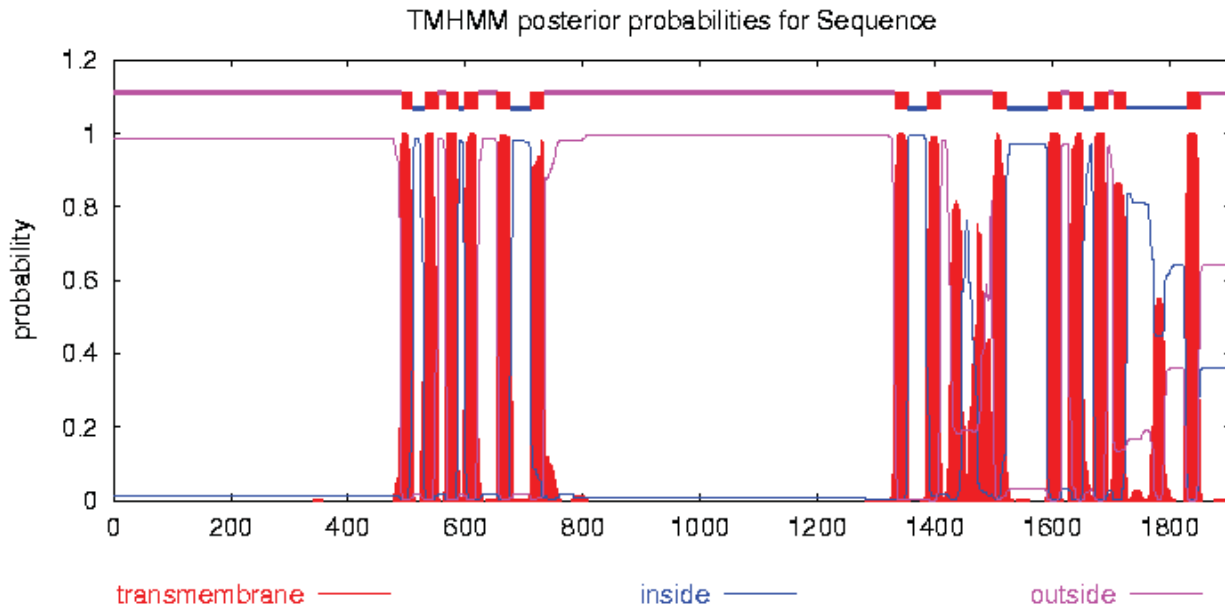

*Cryptococcus neoformans* var. *grubii* Fks1:

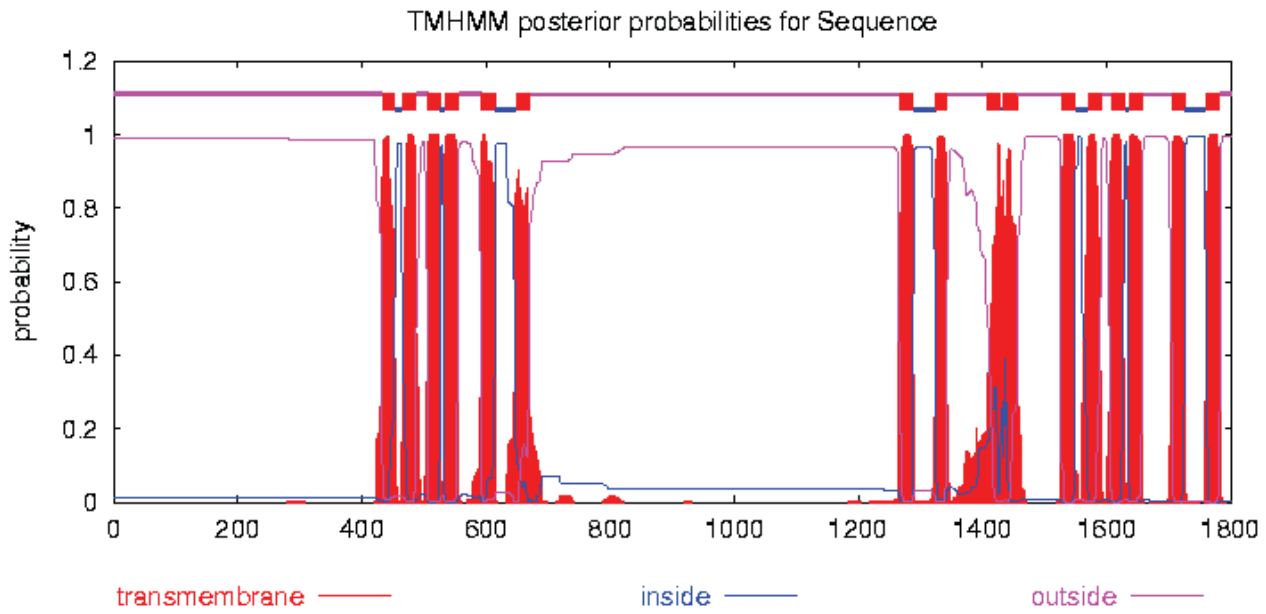

*Rhizopus oryzae* Fks1:

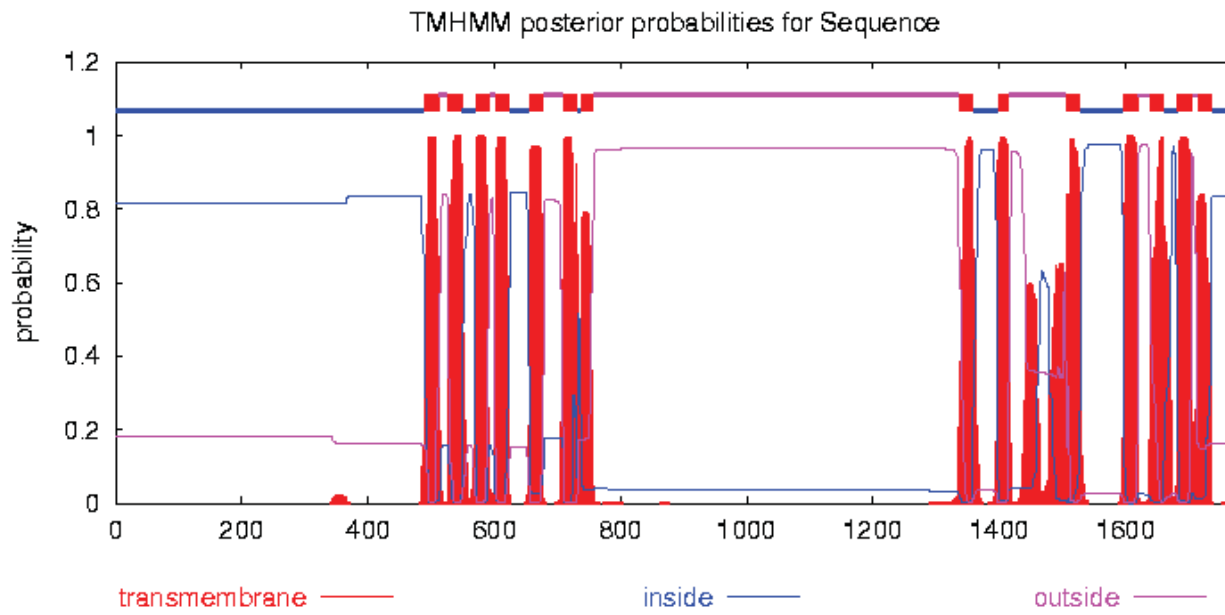

*Allomyces macrogynus* Fks1:

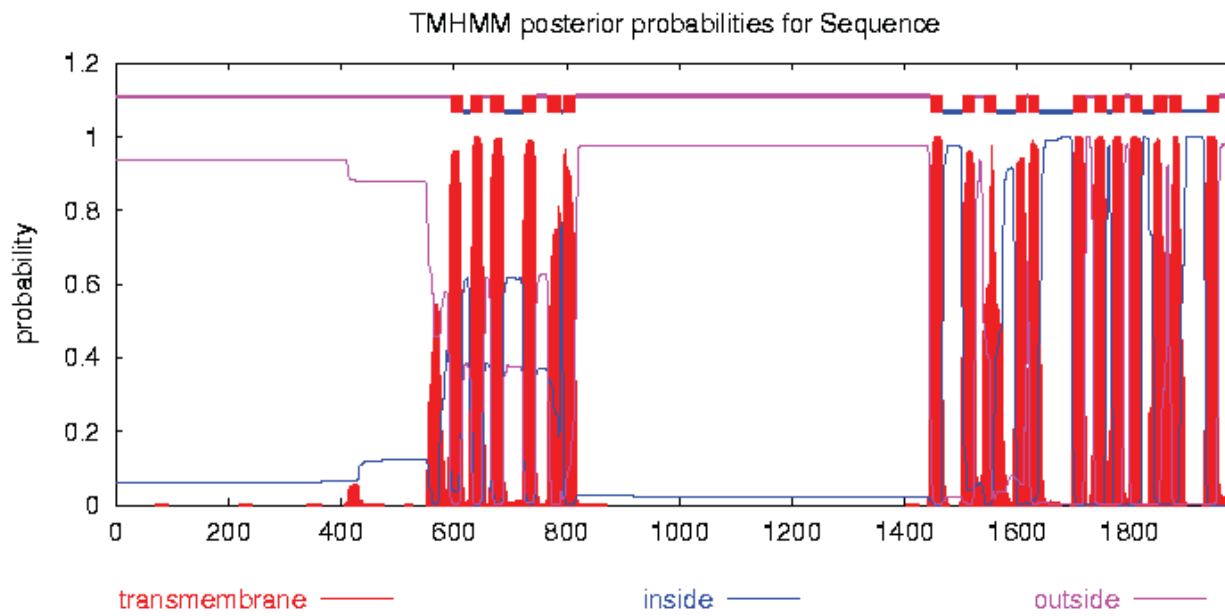

Supplement: supp_11.7.952_figS1-S1_TableS1.pdf [file supp_11.7.952_figS1-S1_TableS1.pdf]
